# Supplementary material
Source: MDPI journal article supplement (https://www.mdpi.com/2571-8800/5/1/6)
Supplement: s1 [file s1]

Article

# Photocatalytic H<sub>2</sub> production on Au/TiO<sub>2</sub>: effect of the Au photodeposition on different TiO<sub>2</sub> crystalline phases

Stefano Andrea Balsamo <sup>1</sup>, Salvatore Sciré <sup>1</sup>, Marcello Condorelli <sup>1</sup> and Roberto Fiorenza <sup>1,\*</sup>

<sup>1</sup> Department of Chemical Sciences, University of Catania, Viale A. Doria 6, 95125 Catania, Italy; stefano.balsamo@phd.unict.it (S.A.B.); sscire@unict.it (S.S.); marcello.condorelli@unict.it (M.C.).

\* Correspondence: rfiorenza@unict.it; Tel.: +39 095738501

- Supporting information

- S1: Raman spectra of bare anatase, rutile and brookite TiO<sub>2</sub>

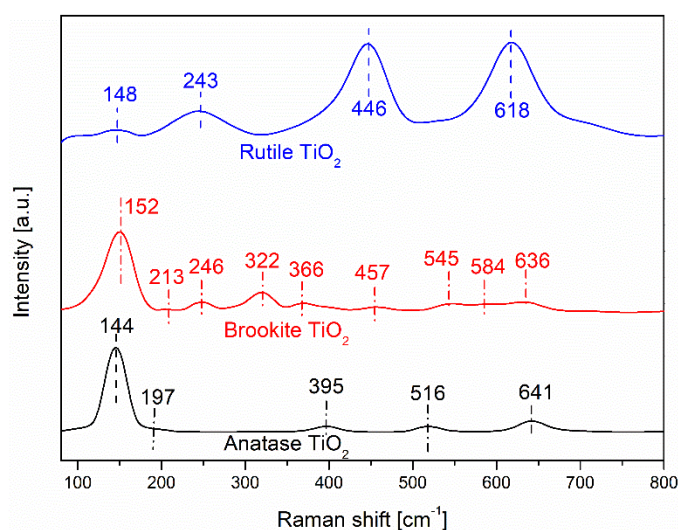

**Figure S1.** Raman spectra of the bare TiO<sub>2</sub> samples.

- S2: XPS spectra of the analysed samples

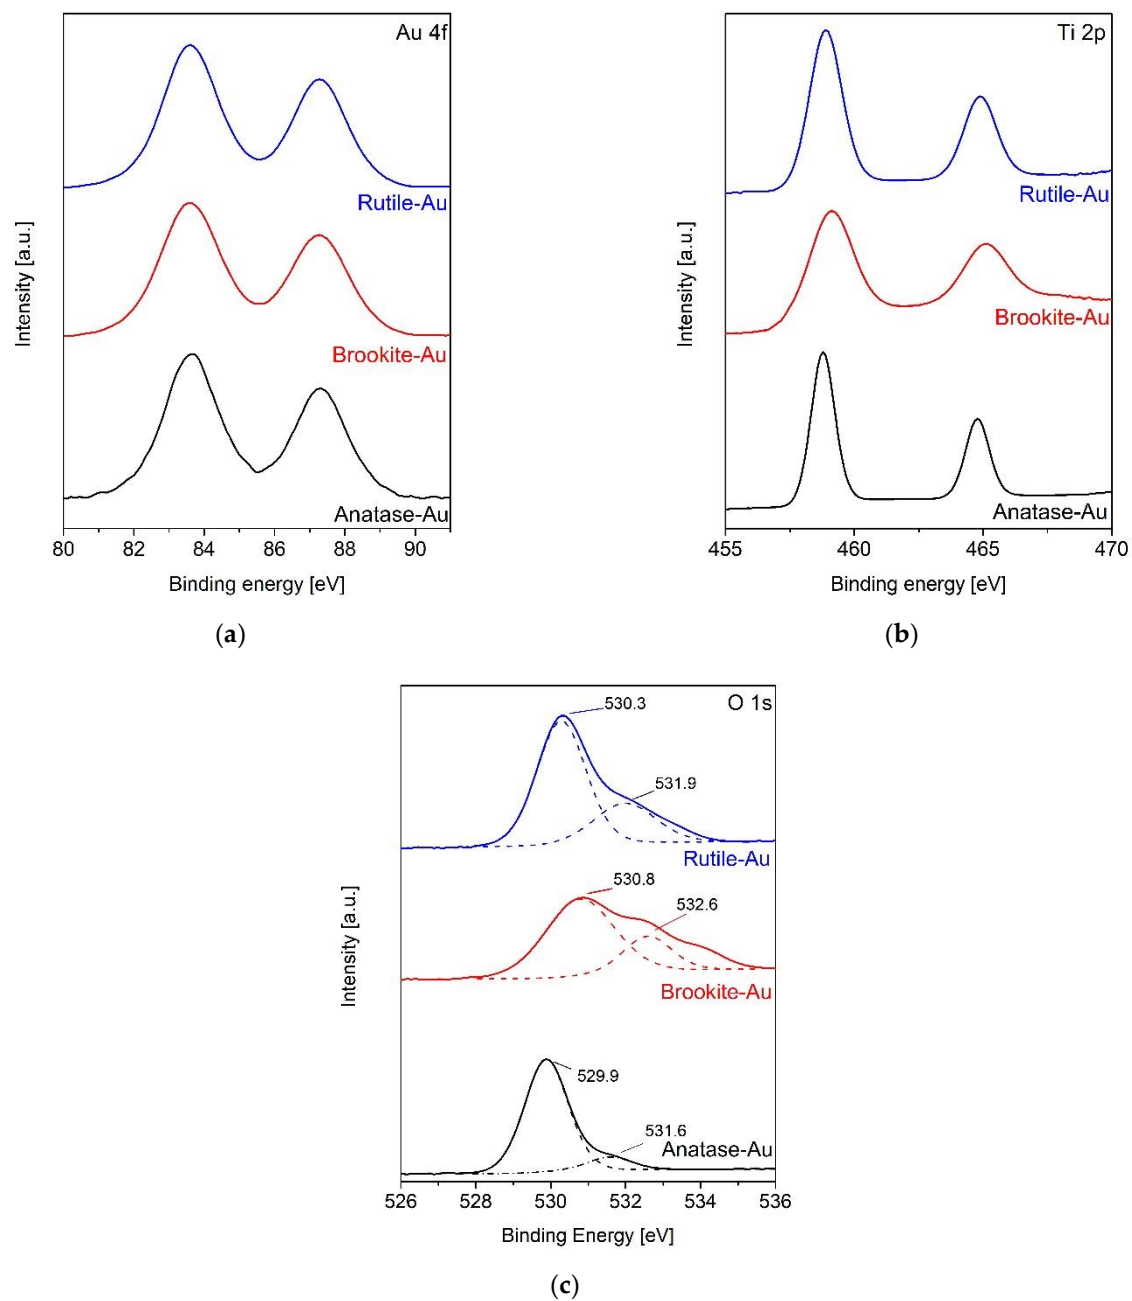

**Figure S2.** (a) XPS spectra in the Au 4f region; (b) XPS spectra in the Ti 2p region; (c) XPS spectra in the O 1s region.
